# Supplementary material
Source: PubMed Central journal article supplement (PMC9051145)
Supplement: sj-pdf-1-jcb-10.1177_0271678X211048981.pdf [file sj-pdf-1-jcb-10.1177_0271678X211048981.pdf]

SUPPLEMENTARY FIGURES

Figure S1

Fig S1  
(a)

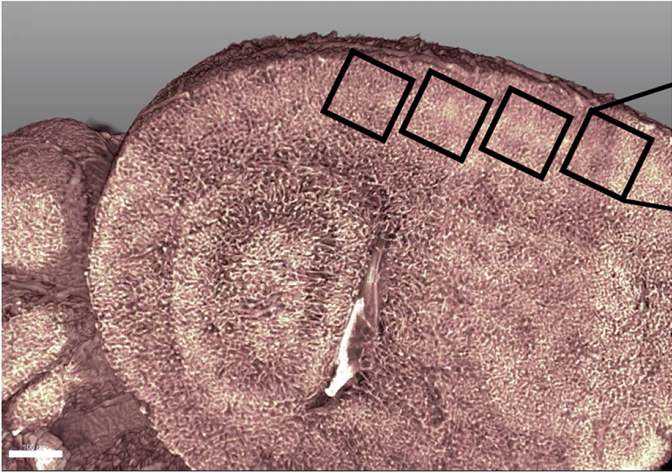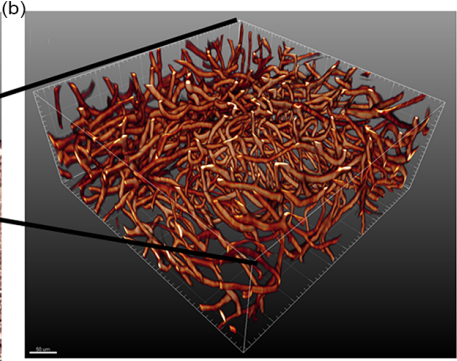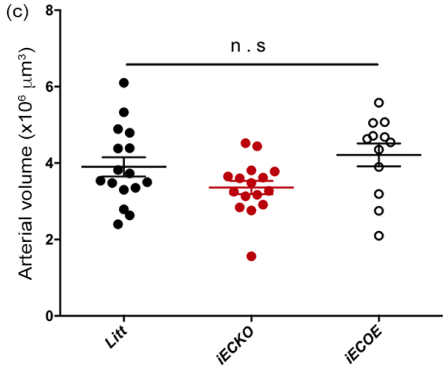

Fig S2

(a)

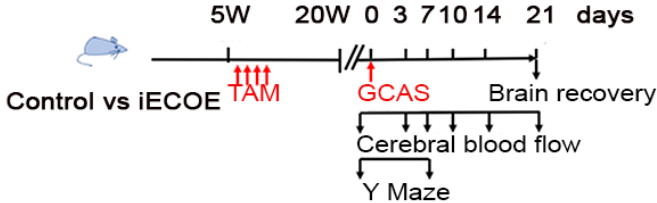

(b) Y Maze

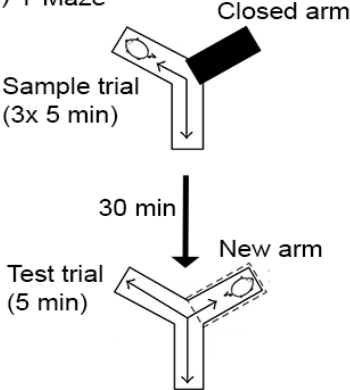

Fig S3

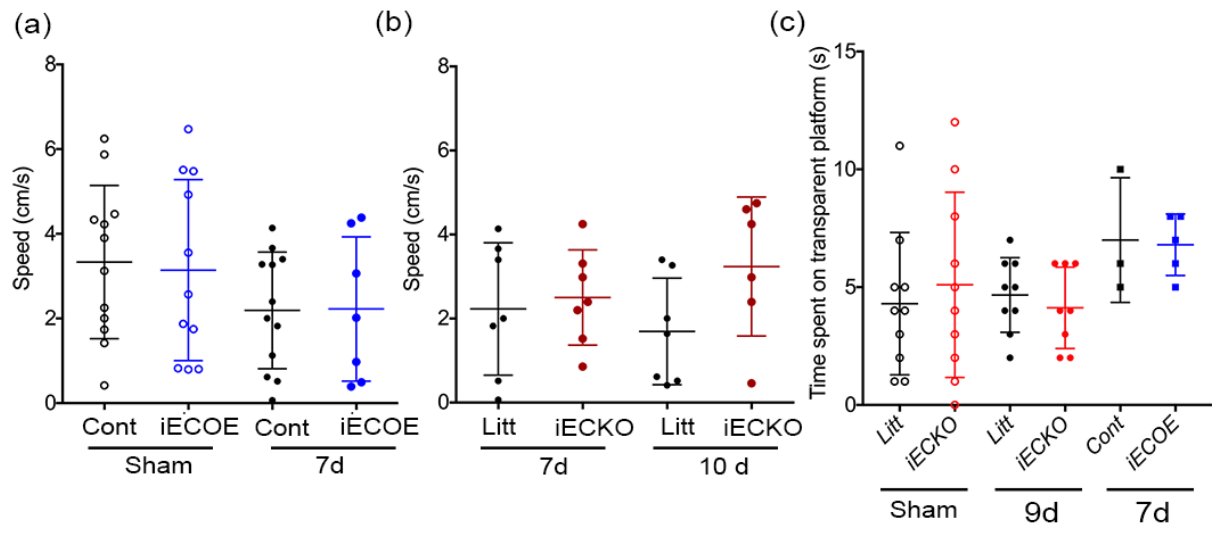

Fig S4

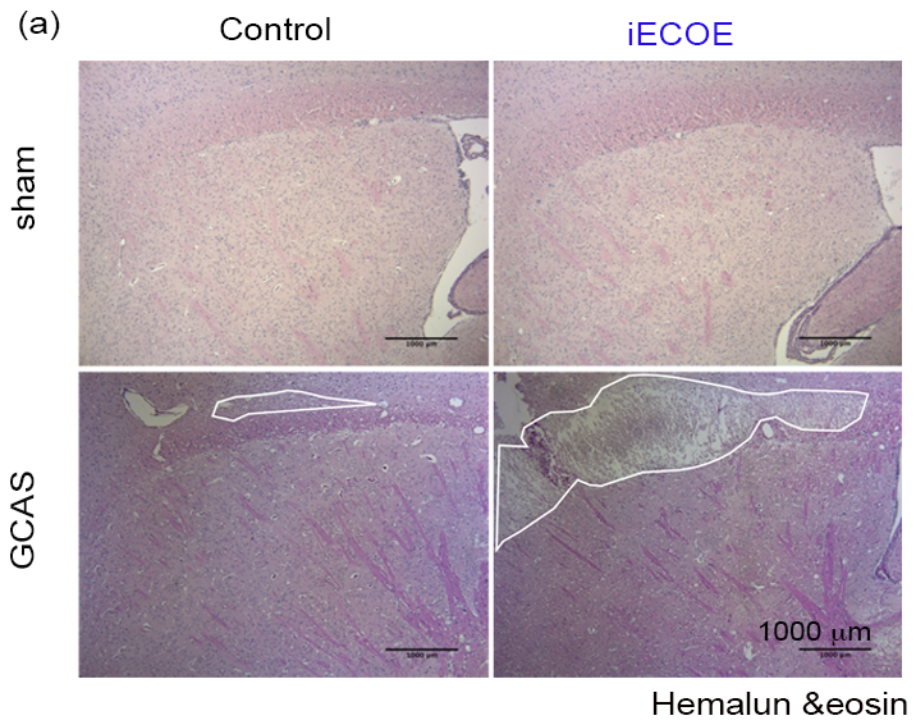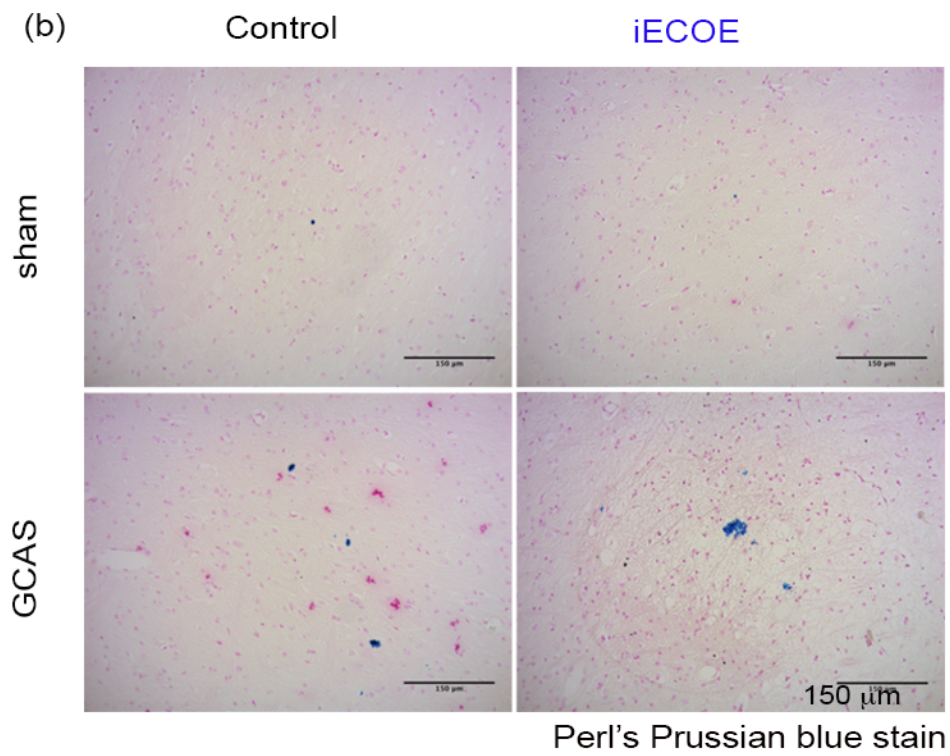

Fig S5

(a)

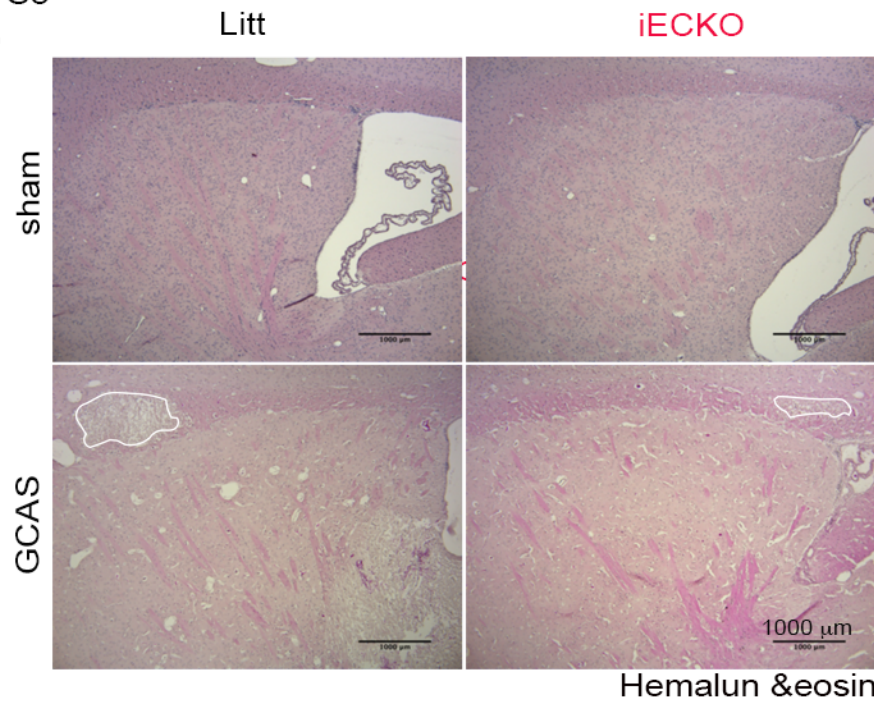

(b)

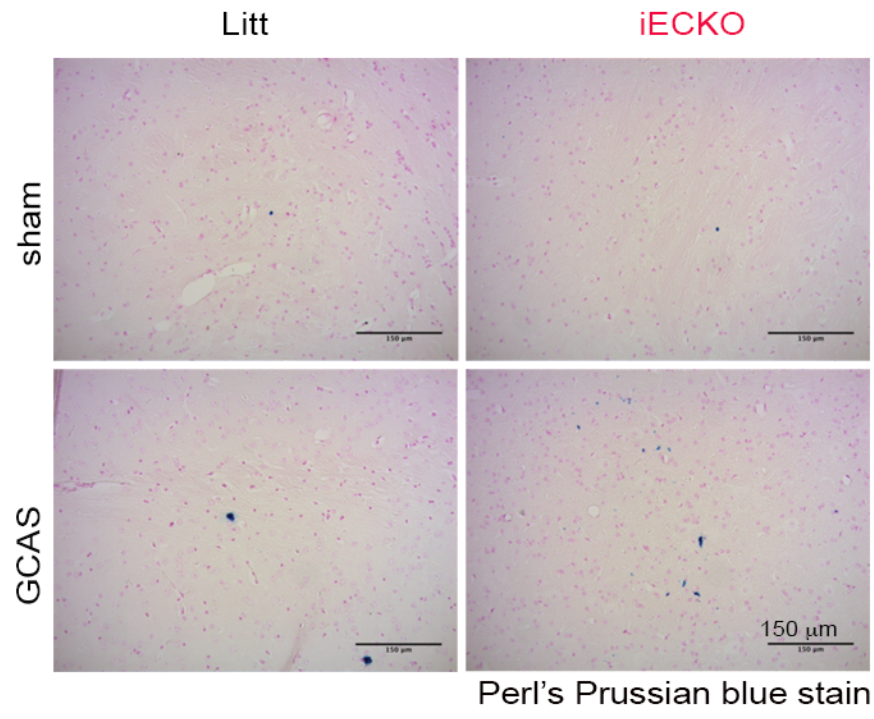

Fig S6

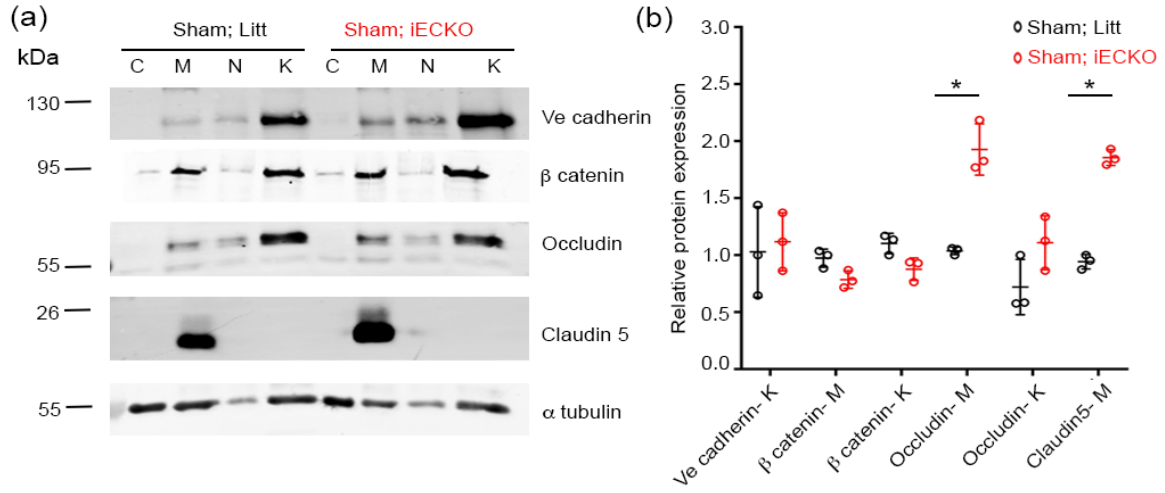

Fig S7

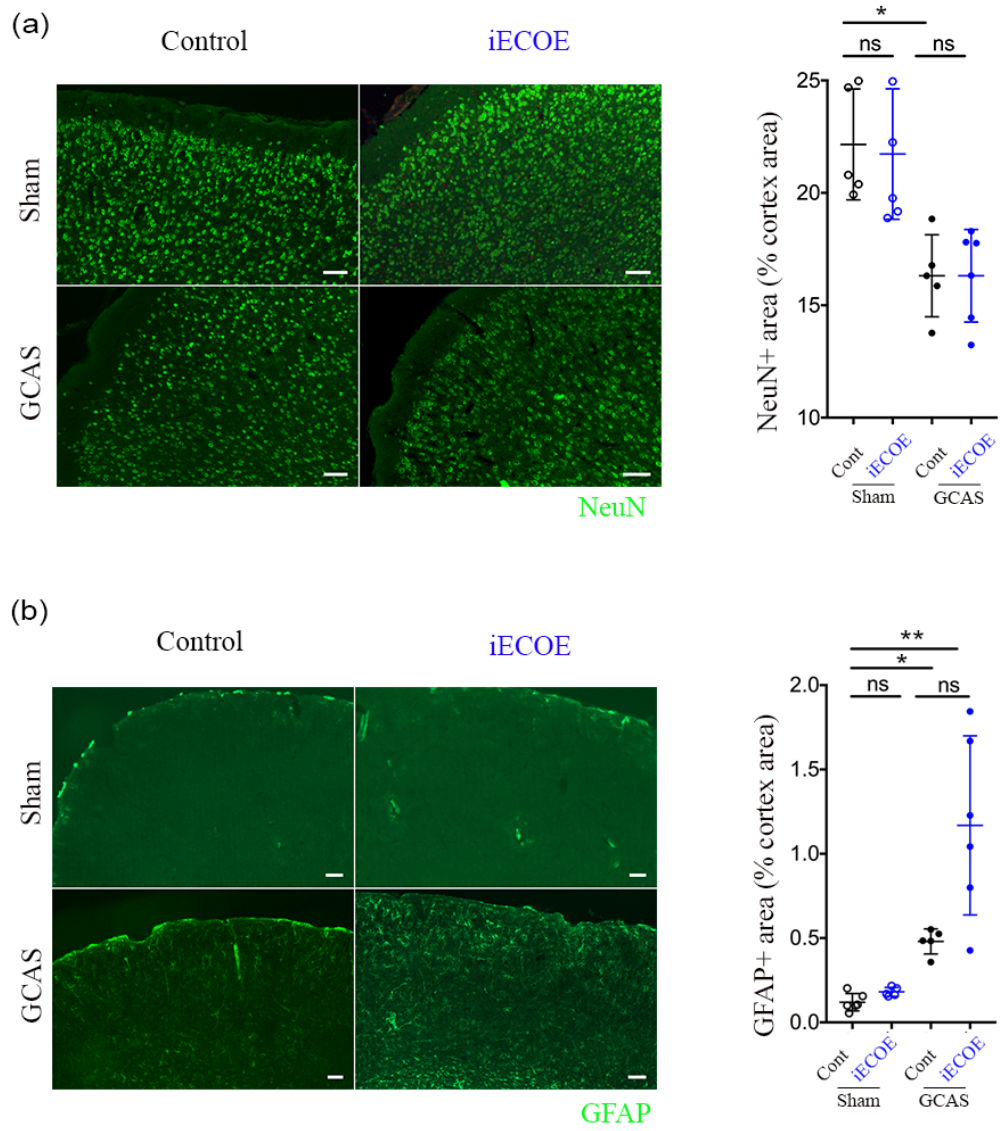

Fig S8

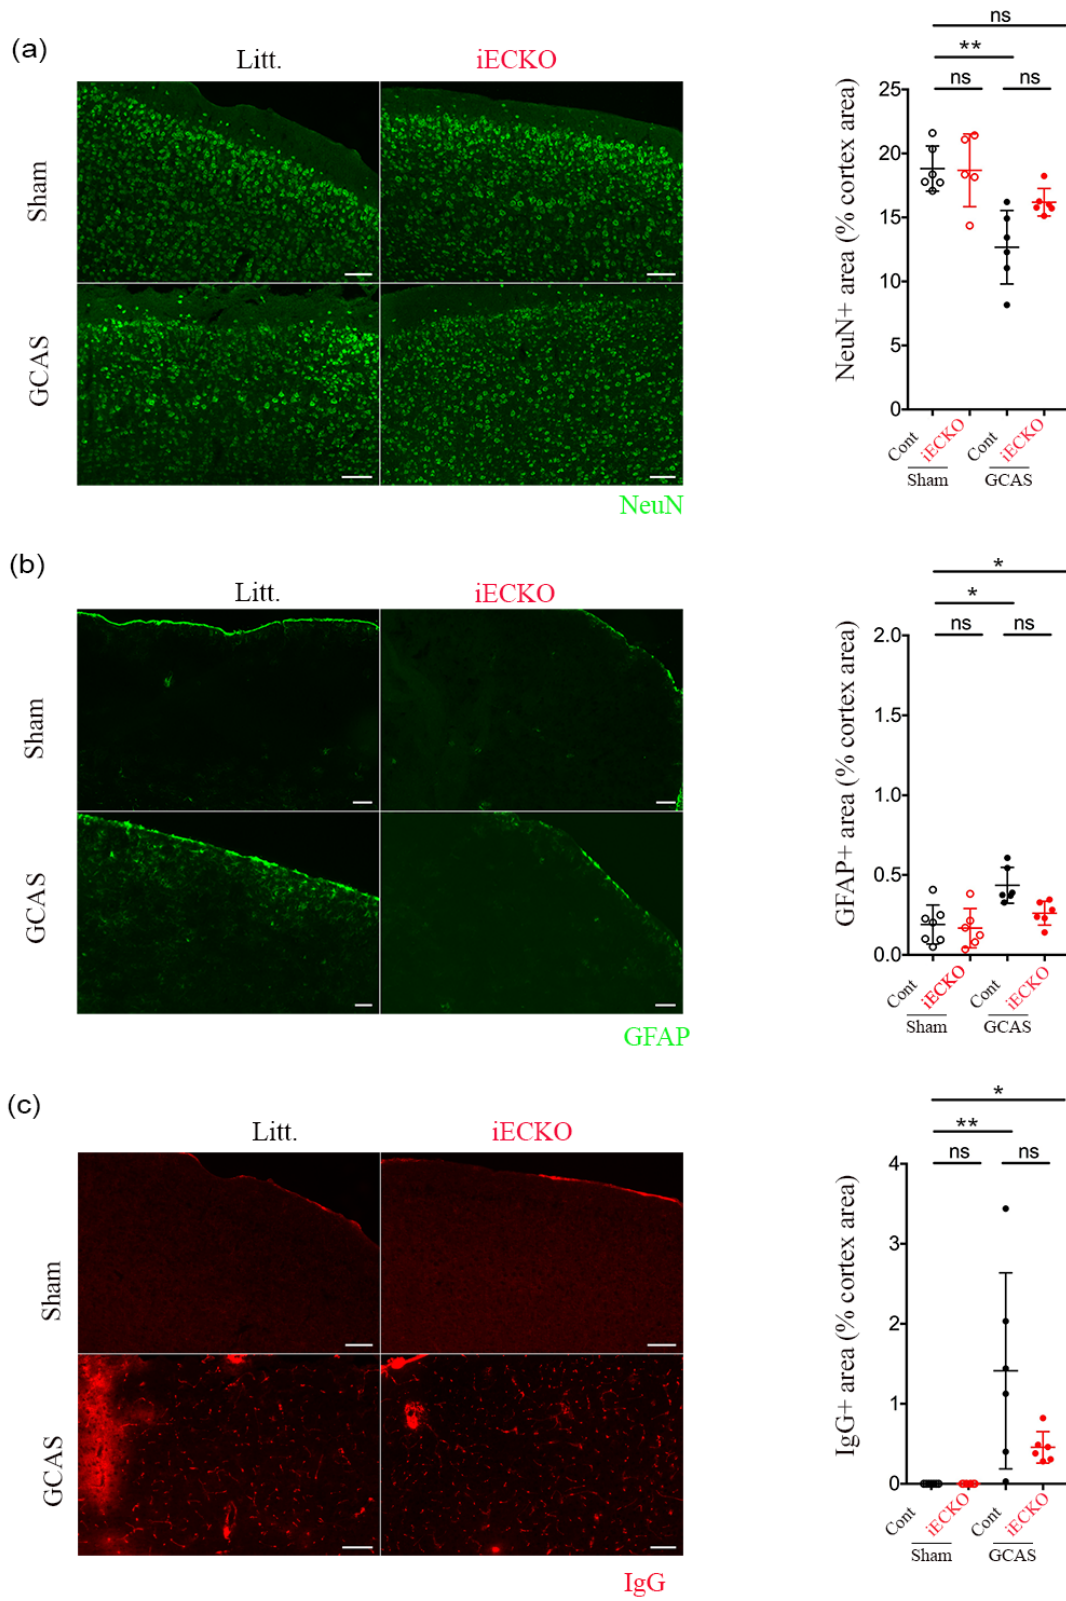



Fig S9

(a)

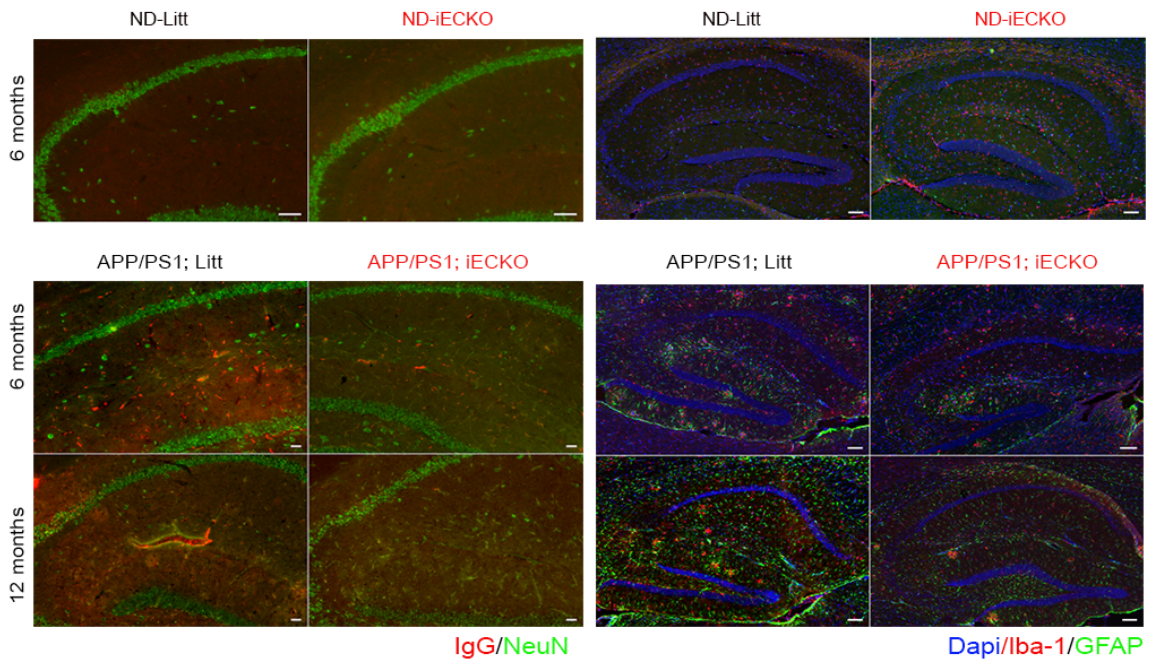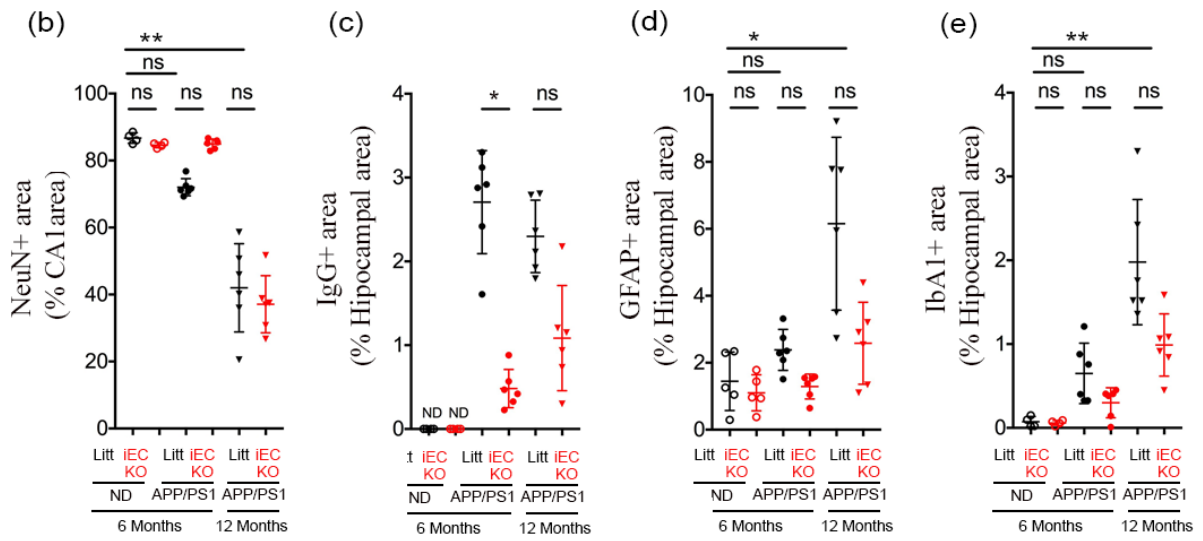

## Supplementary figure legends

### **Fig. S1. 3D view of brain vascular pattern in mutant mice**

(a) large view on brain capillaries in hemi brain. (b) Raw maximum intensity projection and reconstructed tomato lectin-positive blood vessels (c) Vascular volumes quantification with the Imaris Filament Tracer tool in a region of interest chosen of the cortex from littermates (n=4), *Pdzn3* iECKO (n=4) and iECO (n=3) mice. For each mouse, 4 cortical square (500 x 500  $\mu$ m) were quantified. Bars denote mean  $\pm$  SD; One-way ANOVA was performed followed by Bonferroni post hoc test.

### **Fig. S2. Experimental scheme**

(a) Experimental scheme for tamoxifen administration to postnatal *Pdzn3* iECO mice; schedule to evaluate CBF and Y-maze test before and after implantation of ameroid constrictors (GCAS). (b) Y-maze exploration test.

### **Fig. S3. Speed evaluation during Y-maze exploration test of *Pdzn3* iECKO mice 7 and 10 days after GCAS of *Pdzn3* iECO mice**

(a) and *Pdzn3* iECKO (b) before and at time indicated days after GCAS. Each point represents a different mouse. Data are represented as individual values plus means  $\pm$  SD. (c) Evaluation of time spent on transparent platform of *Pdzn3* iECKO mice before and 9 days after GCAS, and of *Pdzn3* iECO mice 7 days after GCAS.

### **Fig S4: coloration of representative brain section images**

(a) for Hemalum and eosin (H&E) staining and (b) for Perl's Prussian blue stain from iECO vs their age-matched control littermates after GCAS. Scale bar represents 1000  $\mu$ m for H&E and 150  $\mu$ m for Perl's coloration.

### **Fig S5: coloration of representative brain section images**

(a) for Hemalum and eosin staining and (b) for Perl's Prussian blue stain from iECKO vs their age-matched littermates (Litt) mice after GCAS. Scale bar represents 1000  $\mu$ m for H&E and 150  $\mu$ m for Perl's coloration.

### **Fig S6: analysis of junction protein levels in brain vessels from sham;iECKO vs sham;littermate mice**

(a) Representative immunoblot images and ( b) quantification of TJ proteins Occludin, Claudin5, Ve cadherin and of b catenin in subcellular brain microvessel fractions from sham;Litt vs sham;iECKO mice (n=3). Cytosol (C), Membrane (M), nucleus (N), cytoskeleton (K) (n=4). Data are represented as mean  $\pm$  SD. Mann-Whitney test was performed. \*  $p < 0.05$ .

**Fig S7: Representative cortical immunofluorescent staining for NeuN and GFAP before (Sham) and after GCAS at 14 days in control and iECO mice.**

(a) NeuN+ and (b) GFAP + areas were quantified as a percentage of the area occupied in the cortical area non-operated (sham) and after GCAS from iECO vs their respective control littermate mice. Data shown in the graphs are obtained in sham condition, from 6 mice per group and in GCAS condition from n=6 iECO vs n=5 control mice; data for four brain slices per mouse were recorded and averaged to produce a single value for each mouse. One-way ANOVA was performed. Data are represented as individual values plus means  $\pm$  SD. ns, non significant, \*  $p < 0.05$ , \*\*  $p < 0.001$ . Scale bar represents 100  $\mu\text{m}$ .

**Fig S8: Representative cortical brain section images stained for (a) NeuN, (b) GFAP and (c) IgG from non-operated littermate (Sham) and after GCAS at 14 days in littermate and iECKO mice**

(a) NeuN, (b) GFAP and (c) IgG + areas were quantified as a percentage of the area occupied in cortical region. Each point represents a different mouse. Data are represented as individual values plus means  $\pm$  SD. n=5-6 mice/group. One-way ANOVA was performed. ns, non significant, \*  $p < 0.05$ , \*\*  $p < 0.001$ . Scale bar represents 100  $\mu\text{m}$ .

**Fig S9: representative hippocampal immunohistochemical staining for (a) IgG (red) and NeuN (green) in left panel and for Iba1 (red) and GFAP (green) in right panel in APP/PS1; iECKO vs their age-matched littermates APP/PS1; Litt at 6 and 12 months vs non demented (ND) iECKO vs their age-matched littermate groups at 6 months.**

(b) NeuN+ cells were quantified as a percentage of the area occupied in the CA1 area (c) IgG (d) GFAP and (e) Iba1 + areas were quantified as a percentage of the area occupied in hippocampal region. Each point represents a different mouse. Data are represented as individual values plus means  $\pm$  SD. n=6 mice/APP/PS1 group at 6 months; n=5-6 mice/ group. One-way ANOVA was performed. ns, non significant, \*  $p < 0.05$ , \*\*  $p < 0.001$ . Scale bar represents 100  $\mu\text{m}$ .

(g) and (h) quantification for GFAP before (sham) and at 21 days after GCAS in littermate and iECKO mice. Data shown in the graphs are obtained in sham condition, from 3 mice per group. Data shown in the graphs are obtained in sham condition, from 3 mice per group; in GCAS condition, from n=10 IECKO vs n=11 littermate mice. Data for four brain slices per mouse were recorded and averaged to produce a single value for each mouse.
